# Supplementary material for: Intakes of Folate, Vitamin B6, and Vitamin B12 in Relation to All-Cause and Cause-Specific Mortality: A National Population-Based Cohort
Source: MDPI journal article supplement (doi:10.3390/nu14112253), 2022-05-27
Supplement: s1 [file s1]

**Table S1. Stratified analyses of the associations between dietary folate intake with all-cause and cause-specific mortality in men**

|                                 |     | Quartile of dietary folate intake |                 |                 |        | <i>P</i> <sub>trend</sub> | <i>P</i> <sub>interaction</sub> |
|---------------------------------|-----|-----------------------------------|-----------------|-----------------|--------|---------------------------|---------------------------------|
|                                 |     | Q1                                | Q2              | Q3              | Q4     |                           |                                 |
| <b>All-cause Mortality</b>      |     |                                   |                 |                 |        |                           |                                 |
| <b>Age</b>                      |     |                                   |                 |                 |        |                           | 0.138                           |
| <65y                            | Ref | 1.00(0.90-1.10)                   | 0.90(0.80-1.02) | 0.85(0.72-0.99) | 0.026  |                           |                                 |
| ≥65y                            | Ref | 0.85(0.79-0.93)                   | 0.84(0.77-0.92) | 0.72(0.64-0.80) | <0.001 |                           |                                 |
| <b>Current smoker</b>           |     |                                   |                 |                 |        |                           | 0.252                           |
| Yes                             | Ref | 0.96(0.85-1.08)                   | 0.84(0.72-0.97) | 0.86(0.72-1.03) | 0.010  |                           |                                 |
| No                              | Ref | 0.94(0.88-1.01)                   | 0.88(0.81-0.96) | 0.77(0.69-0.86) | <0.001 |                           |                                 |
| <b>Current drinker</b>          |     |                                   |                 |                 |        |                           | 0.557                           |
| Yes                             | Ref | 0.95(0.88-1.02)                   | 0.84(0.77-0.93) | 0.79(0.71-0.89) | <0.001 |                           |                                 |
| No                              | Ref | 0.93(0.83-1.03)                   | 0.90(0.80-1.01) | 0.82(0.70-0.96) | 0.010  |                           |                                 |
| <b>BMI</b>                      |     |                                   |                 |                 |        |                           | 0.077                           |
| <30 kg/m <sup>2</sup>           | Ref | 0.92(0.86-0.99)                   | 0.85(0.78-0.92) | 0.79(0.71-0.88) | <0.001 |                           |                                 |
| ≥30 kg/m <sup>2</sup>           | Ref | 0.88(0.77-0.99)                   | 0.87(0.75-1.01) | 0.79(0.66-0.95) | 0.006  |                           |                                 |
| <b>Cardiovascular Mortality</b> |     |                                   |                 |                 |        |                           |                                 |
| <b>Age</b>                      |     |                                   |                 |                 |        |                           | 0.015                           |
| <65y                            | Ref | 0.93(0.74-1.17)                   | 0.75(0.56-1.02) | 0.89(0.61-1.29) | 0.146  |                           |                                 |
| ≥65y                            | Ref | 0.74(0.63-0.87)                   | 0.78(0.65-0.94) | 0.49(0.39-0.62) | <0.001 |                           |                                 |
| <b>Current smoker</b>           |     |                                   |                 |                 |        |                           | 0.389                           |
| Yes                             | Ref | 0.80(0.62-1.03)                   | 0.62(0.45-0.85) | 0.55(0.36-0.85) | <0.001 |                           |                                 |
| No                              | Ref | 0.82(0.71-0.96)                   | 0.79(0.66-0.94) | 0.59(0.47-0.75) | <0.001 |                           |                                 |
| <b>Current drinker</b>          |     |                                   |                 |                 |        |                           | 0.450                           |
| Yes                             | Ref | 0.82(0.69-0.97)                   | 0.64(0.52-0.78) | 0.60(0.47-0.77) | <0.001 |                           |                                 |
| No                              | Ref | 0.84(0.66-1.05)                   | 1.10(0.86-1.42) | 0.75(0.51-1.11) | 0.650  |                           |                                 |
| <b>BMI</b>                      |     |                                   |                 |                 |        |                           | 0.226                           |
| <30 kg/m <sup>2</sup>           | Ref | 0.81(0.70-0.95)                   | 0.75(0.63-0.90) | 0.60(0.47-0.77) | <0.001 |                           |                                 |
| ≥30 kg/m <sup>2</sup>           | Ref | 0.73(0.56-0.94)                   | 0.66(0.48-0.91) | 0.55(0.37-0.83) | 0.001  |                           |                                 |
| <b>Cancer Mortality</b>         |     |                                   |                 |                 |        |                           |                                 |
| <b>Age</b>                      |     |                                   |                 |                 |        |                           | 0.580                           |
| <65y                            | Ref | 1.00(0.82-1.22)                   | 1.01(0.79-1.28) | 0.82(0.59-1.14) | 0.334  |                           |                                 |
| ≥65y                            | Ref | 0.82(0.69-0.98)                   | 0.79(0.65-0.96) | 0.65(0.51-0.82) | <0.001 |                           |                                 |
| <b>Current smoker</b>           |     |                                   |                 |                 |        |                           | 0.770                           |
| Yes                             | Ref | 0.84(0.64-1.10)                   | 0.81(0.58-1.11) | 0.74(0.49-1.12) | 0.085  |                           |                                 |
| No                              | Ref | 0.96(0.82-1.11)                   | 0.92(0.77-1.09) | 0.72(0.58-0.91) | 0.011  |                           |                                 |
| <b>Current drinker</b>          |     |                                   |                 |                 |        |                           | 0.294                           |
| Yes                             | Ref | 1.00(0.85-1.17)                   | 0.94(0.78-1.13) | 0.73(0.57-0.93) | 0.029  |                           |                                 |
| No                              | Ref | 0.74(0.58-0.93)                   | 0.7(0.54-0.91)  | 0.72(0.51-1.00) | 0.008  |                           |                                 |
| <b>BMI</b>                      |     |                                   |                 |                 |        |                           | 0.890                           |
| <30 kg/m <sup>2</sup>           | Ref | 0.91(0.78-1.05)                   | 0.87(0.73-1.04) | 0.63(0.49-0.80) | <0.001 |                           |                                 |
| ≥30 kg/m <sup>2</sup>           | Ref | 0.76(0.58-1.01)                   | 0.89(0.65-1.21) | 0.86(0.59-1.24) | 0.340  |                           |                                 |

Adjusted for age, race/ethnicity, BMI, family income-poverty ratio, smoking status (not for smoke stratified analysis), drinking (not for drinking stratified analysis), leisure-time physical activity, total energy intake, diabetes, hypertension, and cardiovascular disease.

**Table S2. Stratified analyses of the associations between dietary vitamin B6 intake with all-cause and cause-specific mortality in men**

|                          | Quartile of dietary vitamin B6 intake |                 |                 |                 | <i>P</i> <sub>trend</sub> | <i>P</i> <sub>interaction</sub> |
|--------------------------|---------------------------------------|-----------------|-----------------|-----------------|---------------------------|---------------------------------|
|                          | Q1                                    | Q2              | Q3              | Q4              |                           |                                 |
| All-cause Mortality      |                                       |                 |                 |                 |                           |                                 |
| Age                      |                                       |                 |                 |                 |                           | 0.138                           |
| <65y                     | Ref                                   | 0.95(0.86-1.05) | 0.90(0.80-1.01) | 0.80(0.68-0.94) | 0.004                     |                                 |
| ≥65y                     | Ref                                   | 0.88(0.81-0.96) | 0.83(0.76-0.91) | 0.74(0.66-0.82) | <0.001                    |                                 |
| Current smoker           |                                       |                 |                 |                 |                           | 0.252                           |
| Yes                      | Ref                                   | 0.91(0.81-1.02) | 0.86(0.75-0.99) | 0.78(0.65-0.94) | 0.003                     |                                 |
| No                       | Ref                                   | 0.91(0.85-0.98) | 0.85(0.78-0.93) | 0.79(0.71-0.88) | <0.001                    |                                 |
| Current drinker          |                                       |                 |                 |                 |                           | 0.557                           |
| Yes                      | Ref                                   | 0.93(0.86-1.01) | 0.89(0.82-0.98) | 0.77(0.69-0.87) | <0.001                    |                                 |
| No                       | Ref                                   | 0.95(0.86-1.06) | 0.84(0.74-0.95) | 0.86(0.74-1.01) | 0.007                     |                                 |
| BMI                      |                                       |                 |                 |                 |                           | 0.077                           |
| <30 kg/m²                | Ref                                   | 0.93(0.87-1.00) | 0.85(0.78-0.92) | 0.80(0.72-0.89) | <0.001                    |                                 |
| ≥30 kg/m²                | Ref                                   | 0.97(0.86-1.10) | 0.93(0.81-1.08) | 0.83(0.69-1.00) | 0.062                     |                                 |
| Cardiovascular Mortality |                                       |                 |                 |                 |                           |                                 |
| Age                      |                                       |                 |                 |                 |                           | 0.014                           |
| <65y                     | Ref                                   | 0.92(0.73-1.16) | 0.76(0.57-1.03) | 0.93(0.64-1.35) | 0.194                     |                                 |
| ≥65y                     | Ref                                   | 0.81(0.69-0.95) | 0.74(0.62-0.89) | 0.59(0.47-0.74) | <0.001                    |                                 |
| Current smoker           |                                       |                 |                 |                 |                           | 0.389                           |
| Yes                      | Ref                                   | 0.73(0.57-0.94) | 0.63(0.46-0.86) | 0.59(0.39-0.89) | <0.001                    |                                 |
| No                       | Ref                                   | 0.85(0.73-0.98) | 0.76(0.64-0.91) | 0.69(0.55-0.87) | <0.001                    |                                 |
| Current drinker          |                                       |                 |                 |                 |                           | 0.450                           |
| Yes                      | Ref                                   | 0.92(0.78-1.08) | 0.75(0.62-0.92) | 0.67(0.52-0.86) | <0.001                    |                                 |
| No                       | Ref                                   | 0.86(0.68-1.08) | 0.86(0.66-1.14) | 0.85(0.59-1.23) | 0.289                     |                                 |
| BMI                      |                                       |                 |                 |                 |                           | 0.226                           |
| <30 kg/m²                | Ref                                   | 0.89(0.77-1.03) | 0.74(0.62-0.89) | 0.71(0.56-0.90) | <0.001                    |                                 |
| ≥30 kg/m²                | Ref                                   | 0.78(0.60-1.01) | 0.79(0.58-1.07) | 0.66(0.44-0.98) | 0.020                     |                                 |
| Cancer Mortality         |                                       |                 |                 |                 |                           |                                 |
| Age                      |                                       |                 |                 |                 |                           | 0.580                           |
| <65y                     | Ref                                   | 0.88(0.72-1.07) | 1.13(0.90-1.41) | 0.76(0.54-1.07) | 0.579                     |                                 |
| ≥65y                     | Ref                                   | 0.79(0.66-0.95) | 0.84(0.69-1.01) | 0.71(0.56-0.90) | 0.005                     |                                 |
| Current smoker           |                                       |                 |                 |                 |                           | 0.770                           |
| Yes                      | Ref                                   | 0.94(0.72-1.22) | 0.94(0.69-1.28) | 0.68(0.44-1.06) | 0.152                     |                                 |
| No                       | Ref                                   | 0.79(0.67-0.92) | 0.94(0.80-1.11) | 0.77(0.62-0.96) | 0.049                     |                                 |
| Current drinker          |                                       |                 |                 |                 |                           | 0.294                           |
| Yes                      | Ref                                   | 0.87(0.74-1.02) | 1.01(0.84-1.20) | 0.67(0.52-0.86) | 0.028                     |                                 |
| No                       | Ref                                   | 0.84(0.66-1.06) | 0.80(0.62-1.05) | 0.82(0.59-1.13) | 0.114                     |                                 |
| BMI                      |                                       |                 |                 |                 |                           | 0.890                           |
| <30 kg/m²                | Ref                                   | 0.81(0.7-0.95)  | 0.97(0.83-1.15) | 0.7(0.55-0.88)  | 0.022                     |                                 |
| ≥30 kg/m²                | Ref                                   | 1.01(0.78-1.31) | 0.9(0.65-1.24)  | 0.99(0.68-1.44) | 0.722                     |                                 |

Adjusted for age, race/ethnicity, BMI, family income-poverty ratio, smoking status (not for smoke stratified analysis), drinking (not for drinking stratified analysis), leisure-time physical activity, total energy intake, diabetes, hypertension, and cardiovascular disease.

**Table S3. Stratified analyses of the associations between dietary vitamin B12 intake with all-cause and cause-specific mortality in men**

|                                 |     | Quartile of dietary vitamin B12 intake |                 |                 |       | <i>P</i> <sub>trend</sub> | <i>P</i> <sub>interaction</sub> |
|---------------------------------|-----|----------------------------------------|-----------------|-----------------|-------|---------------------------|---------------------------------|
|                                 |     | Q1                                     | Q2              | Q3              | Q4    |                           |                                 |
| <b>All-cause Mortality</b>      |     |                                        |                 |                 |       |                           |                                 |
| <b>Age</b>                      |     |                                        |                 |                 |       |                           | 0.436                           |
| <65y                            | Ref | 1.00(0.90-1.10)                        | 0.99(0.87-1.12) | 1.08(0.92-1.25) | 0.564 |                           |                                 |
| ≥65y                            | Ref | 1.05(0.96-1.14)                        | 0.99(0.90-1.09) | 1.02(0.91-1.14) | 0.962 |                           |                                 |
| <b>Current smoker</b>           |     |                                        |                 |                 |       |                           | 0.911                           |
| Yes                             | Ref | 1.04(0.91-1.17)                        | 1.09(0.94-1.27) | 1.18(0.99-1.41) | 0.063 |                           |                                 |
| No                              | Ref | 1.00(0.93-1.08)                        | 0.99(0.91-1.09) | 0.96(0.87-1.07) | 0.570 |                           |                                 |
| <b>Current drinker</b>          |     |                                        |                 |                 |       |                           | 0.324                           |
| Yes                             | Ref | 1.01(0.93-1.09)                        | 1.01(0.92-1.11) | 1.03(0.92-1.15) | 0.696 |                           |                                 |
| No                              | Ref | 1.00(0.89-1.12)                        | 1.03(0.90-1.17) | 1.05(0.90-1.22) | 0.532 |                           |                                 |
| <b>BMI</b>                      |     |                                        |                 |                 |       |                           | 0.963                           |
| <24 kg/m <sup>2</sup>           | Ref | 1.00(0.93-1.08)                        | 1.01(0.92-1.10) | 1.04(0.93-1.15) | 0.580 |                           |                                 |
| ≥24 kg/m <sup>2</sup>           | Ref | 0.97(0.86-1.11)                        | 1.00(0.86-1.16) | 0.98(0.81-1.17) | 0.868 |                           |                                 |
| <b>Cardiovascular Mortality</b> |     |                                        |                 |                 |       |                           |                                 |
| <b>Age</b>                      |     |                                        |                 |                 |       |                           | 0.098                           |
| <65y                            | Ref | 1.02(0.80-1.30)                        | 1.00(0.74-1.34) | 1.28(0.90-1.83) | 0.329 |                           |                                 |
| ≥65y                            | Ref | 0.90(0.76-1.06)                        | 0.79(0.65-0.96) | 0.83(0.66-1.04) | 0.033 |                           |                                 |
| <b>Current smoker</b>           |     |                                        |                 |                 |       |                           | 0.700                           |
| Yes                             | Ref | 1.01(0.77-1.32)                        | 1.06(0.77-1.47) | 1.37(0.95-1.99) | 0.161 |                           |                                 |
| No                              | Ref | 0.91(0.77-1.07)                        | 0.91(0.75-1.09) | 0.80(0.63-1.01) | 0.071 |                           |                                 |
| <b>Current drinker</b>          |     |                                        |                 |                 |       |                           | 0.847                           |
| Yes                             | Ref | 0.94(0.79-1.12)                        | 0.95(0.78-1.17) | 0.93(0.72-1.19) | 0.554 |                           |                                 |
| No                              | Ref | 0.92(0.73-1.15)                        | 0.80(0.61-1.05) | 0.98(0.71-1.35) | 0.465 |                           |                                 |
| <b>BMI</b>                      |     |                                        |                 |                 |       |                           | 0.401                           |
| <30 kg/m <sup>2</sup>           | Ref | 0.99(0.85-1.16)                        | 0.96(0.79-1.16) | 0.97(0.76-1.22) | 0.683 |                           |                                 |
| ≥30 kg/m <sup>2</sup>           | Ref | 0.82(0.63-1.07)                        | 0.77(0.55-1.07) | 0.90(0.62-1.32) | 0.303 |                           |                                 |
| <b>Cancer Mortality</b>         |     |                                        |                 |                 |       |                           |                                 |
| <b>Age</b>                      |     |                                        |                 |                 |       |                           | 0.706                           |
| <65y                            | Ref | 0.87(0.70-1.07)                        | 1.05(0.83-1.32) | 0.93(0.68-1.27) | 0.257 |                           |                                 |
| ≥65y                            | Ref | 1.13(0.94-1.36)                        | 1.01(0.81-1.25) | 1.17(0.92-1.49) | 0.365 |                           |                                 |
| <b>Current smoker</b>           |     |                                        |                 |                 |       |                           | 0.786                           |
| Yes                             | Ref | 0.99(0.75-1.33)                        | 1.11(0.80-1.55) | 1.01(0.67-1.53) | 0.749 |                           |                                 |
| No                              | Ref | 0.96(0.82-1.13)                        | 1.05(0.88-1.26) | 0.98(0.79-1.22) | 0.862 |                           |                                 |
| <b>Current drinker</b>          |     |                                        |                 |                 |       |                           | 0.970                           |
| Yes                             | Ref | 1.00(0.85-1.19)                        | 1.09(0.90-1.31) | 1.01(0.80-1.28) | 0.664 |                           |                                 |
| No                              | Ref | 1.05(0.82-1.34)                        | 0.99(0.75-1.31) | 0.97(0.70-1.35) | 0.821 |                           |                                 |
| <b>BMI</b>                      |     |                                        |                 |                 |       |                           | 0.162                           |
| <30 kg/m <sup>2</sup>           | Ref | 0.97(0.82-1.13)                        | 1.04(0.87-1.24) | 0.90(0.72-1.12) | 0.615 |                           |                                 |
| ≥30 kg/m <sup>2</sup>           | Ref | 0.83(0.62-1.12)                        | 1.22(0.89-1.66) | 1.09(0.75-1.59) | 0.317 |                           |                                 |

Adjusted for age, race/ethnicity, BMI, family income-poverty ratio, smoking status (not for smoke stratified analysis), drinking (not for drinking stratified analysis), leisure-time physical activity, total energy intake, diabetes, hypertension, and cardiovascular disease.

**Table S4. Stratified analyses of the associations between dietary folate intake with all-cause and cause-specific mortality in women**

|                                 |     | Quartile of dietary folate intake |                 |                 |        | <i>P</i> <sub>trend</sub> | <i>P</i> <sub>interaction</sub> |
|---------------------------------|-----|-----------------------------------|-----------------|-----------------|--------|---------------------------|---------------------------------|
|                                 |     | Q1                                | Q2              | Q3              | Q4     |                           |                                 |
| <b>All-cause Mortality</b>      |     |                                   |                 |                 |        |                           |                                 |
| <b>Age</b>                      |     |                                   |                 |                 |        |                           | 0.697                           |
| <65y                            | Ref | 0.92(0.82-1.02)                   | 0.89(0.77-1.02) | 0.91(0.76-1.08) | 0.089  |                           |                                 |
| ≥65y                            | Ref | 0.91(0.83-0.99)                   | 0.86(0.78-0.94) | 0.84(0.75-0.94) | <0.001 |                           |                                 |
| <b>Current smoker</b>           |     |                                   |                 |                 |        |                           | 0.277                           |
| Yes                             | Ref | 0.94(0.86-1.03)                   | 0.95(0.85-1.05) | 0.86(0.75-0.98) | 0.034  |                           |                                 |
| No                              | Ref | 0.88(0.79-0.98)                   | 0.80(0.71-0.91) | 0.76(0.65-0.89) | <0.001 |                           |                                 |
| <b>Current drinker</b>          |     |                                   |                 |                 |        |                           | 0.065                           |
| Yes                             | Ref | 0.91(0.83-0.99)                   | 0.87(0.78-0.97) | 0.80(0.69-0.91) | <0.001 |                           |                                 |
| No                              | Ref | 0.91(0.82-1.01)                   | 0.84(0.74-0.96) | 0.90(0.77-1.05) | 0.033  |                           |                                 |
| <b>BMI</b>                      |     |                                   |                 |                 |        |                           | 0.765                           |
| <30 kg/m <sup>2</sup>           | Ref | 0.91(0.84-0.99)                   | 0.87(0.79-0.96) | 0.89(0.79-1.00) | 0.006  |                           |                                 |
| ≥30 kg/m <sup>2</sup>           | Ref | 0.93(0.83-1.05)                   | 0.89(0.77-1.02) | 0.81(0.68-0.96) | 0.009  |                           |                                 |
| <b>Cardiovascular Mortality</b> |     |                                   |                 |                 |        |                           |                                 |
| <b>Age</b>                      |     |                                   |                 |                 |        |                           | 0.650                           |
| <65y                            | Ref | 0.95(0.72-1.27)                   | 0.52(0.32-0.84) | 0.67(0.39-1.12) | 0.015  |                           |                                 |
| ≥65y                            | Ref | 0.79(0.66-0.95)                   | 0.68(0.55-0.84) | 0.57(0.44-0.75) | <0.001 |                           |                                 |
| <b>Current smoker</b>           |     |                                   |                 |                 |        |                           | 0.745                           |
| Yes                             | Ref | 0.77(0.64-0.94)                   | 0.69(0.54-0.88) | 0.54(0.39-0.75) | <0.001 |                           |                                 |
| No                              | Ref | 0.86(0.68-1.10)                   | 0.67(0.49-0.90) | 0.53(0.36-0.80) | <0.001 |                           |                                 |
| <b>Current drinker</b>          |     |                                   |                 |                 |        |                           | 0.642                           |
| Yes                             | Ref | 0.84(0.69-1.03)                   | 0.64(0.49-0.83) | 0.45(0.31-0.66) | <0.001 |                           |                                 |
| No                              | Ref | 0.85(0.67-1.07)                   | 0.81(0.6-1.10)  | 0.77(0.51-1.16) | 0.120  |                           |                                 |
| <b>BMI</b>                      |     |                                   |                 |                 |        |                           | 0.287                           |
| <30 kg/m <sup>2</sup>           | Ref | 0.87(0.73-1.05)                   | 0.71(0.56-0.89) | 0.58(0.43-0.79) | <0.001 |                           |                                 |
| ≥30 kg/m <sup>2</sup>           | Ref | 0.73(0.57-0.94)                   | 0.65(0.47-0.91) | 0.48(0.31-0.76) | <0.001 |                           |                                 |
| <b>Cancer Mortality</b>         |     |                                   |                 |                 |        |                           |                                 |
| <b>Age</b>                      |     |                                   |                 |                 |        |                           | 0.649                           |
| <65y                            | Ref | 0.86(0.70-1.05)                   | 1.00(0.78-1.28) | 0.79(0.57-1.10) | 0.270  |                           |                                 |
| ≥65y                            | Ref | 1.03(0.82-1.30)                   | 1.05(0.81-1.35) | 0.87(0.64-1.17) | 0.532  |                           |                                 |
| <b>Current smoker</b>           |     |                                   |                 |                 |        |                           | 0.391                           |
| Yes                             | Ref | 0.97(0.78-1.21)                   | 1.29(1.01-1.64) | 0.92(0.67-1.27) | 0.514  |                           |                                 |
| No                              | Ref | 0.83(0.68-1.03)                   | 0.83(0.65-1.06) | 0.63(0.46-0.86) | 0.004  |                           |                                 |
| <b>Current drinker</b>          |     |                                   |                 |                 |        |                           | 0.355                           |
| Yes                             | Ref | 0.91(0.76-1.10)                   | 0.96(0.77-1.19) | 0.77(0.58-1.02) | 0.132  |                           |                                 |
| No                              | Ref | 0.98(0.75-1.28)                   | 1.13(0.83-1.53) | 0.92(0.62-1.36) | 0.976  |                           |                                 |
| <b>BMI</b>                      |     |                                   |                 |                 |        |                           | 0.961                           |
| <30 kg/m <sup>2</sup>           | Ref | 0.88(0.72-1.06)                   | 1.05(0.85-1.3)  | 0.93(0.71-1.23) | 0.905  |                           |                                 |
| ≥30 kg/m <sup>2</sup>           | Ref | 1.01(0.79-1.28)                   | 1.00(0.75-1.34) | 0.62(0.41-0.92) | 0.080  |                           |                                 |

Adjusted for age, race/ethnicity, BMI, family income-poverty ratio, smoking status (not for smoke stratified analysis), drinking (not for drinking stratified analysis), leisure-time physical activity, total energy intake, diabetes, hypertension, and cardiovascular disease.

**Table S5. Stratified analyses of the associations between dietary vitamin B6 intake with all-cause and cause-specific mortality in women**

|                                 |     | Quartile of dietary vitamin B6 intake |                 |                 |        | <i>P</i> <sub>trend</sub> | <i>P</i> <sub>interaction</sub> |
|---------------------------------|-----|---------------------------------------|-----------------|-----------------|--------|---------------------------|---------------------------------|
|                                 |     | Q1                                    | Q2              | Q3              | Q4     |                           |                                 |
| <b>All-cause Mortality</b>      |     |                                       |                 |                 |        |                           |                                 |
| <b>Age</b>                      |     |                                       |                 |                 |        |                           | 0.697                           |
| <65y                            | Ref | 1.02(0.91-1.13)                       | 0.83(0.73-0.96) | 0.87(0.73-1.04) | 0.016  |                           |                                 |
| ≥65y                            | Ref | 0.90(0.82-0.98)                       | 0.92(0.84-1.01) | 0.87(0.77-0.97) | 0.013  |                           |                                 |
| <b>Current smoker</b>           |     |                                       |                 |                 |        |                           | 0.277                           |
| Yes                             | Ref | 0.91(0.84-1.00)                       | 0.93(0.84-1.03) | 0.92(0.81-1.04) | 0.096  |                           |                                 |
| No                              | Ref | 0.98(0.88-1.08)                       | 0.87(0.77-0.98) | 0.77(0.66-0.9)  | <0.001 |                           |                                 |
| <b>Current drinker</b>          |     |                                       |                 |                 |        |                           | 0.065                           |
| Yes                             | Ref | 0.97(0.89-1.05)                       | 0.83(0.75-0.92) | 0.82(0.72-0.94) | <0.001 |                           |                                 |
| No                              | Ref | 0.89(0.80-0.99)                       | 0.98(0.86-1.11) | 0.97(0.83-1.15) | 0.776  |                           |                                 |
| <b>BMI</b>                      |     |                                       |                 |                 |        |                           | 0.765                           |
| <30 kg/m <sup>2</sup>           | Ref | 0.95(0.87-1.03)                       | 0.94(0.86-1.04) | 0.92(0.82-1.04) | 0.134  |                           |                                 |
| ≥30 kg/m <sup>2</sup>           | Ref | 0.94(0.84-1.05)                       | 0.83(0.73-0.95) | 0.80(0.67-0.96) | 0.002  |                           |                                 |
| <b>Cardiovascular Mortality</b> |     |                                       |                 |                 |        |                           |                                 |
| <b>Age</b>                      |     |                                       |                 |                 |        |                           | 0.650                           |
| <65y                            | Ref | 0.91(0.69-1.21)                       | 0.49(0.32-0.75) | 0.48(0.26-0.89) | <0.001 |                           |                                 |
| ≥65y                            | Ref | 0.90(0.75-1.07)                       | 0.91(0.74-1.11) | 0.58(0.44-0.76) | 0.001  |                           |                                 |
| <b>Current smoker</b>           |     |                                       |                 |                 |        |                           | 0.745                           |
| Yes                             | Ref | 0.93(0.77-1.13)                       | 0.82(0.65-1.03) | 0.68(0.50-0.92) | 0.008  |                           |                                 |
| No                              | Ref | 0.95(0.75-1.21)                       | 0.77(0.58-1.02) | 0.40(0.26-0.63) | <0.001 |                           |                                 |
| <b>Current drinker</b>          |     |                                       |                 |                 |        |                           | 0.642                           |
| Yes                             | Ref | 0.89(0.73-1.08)                       | 0.64(0.49-0.82) | 0.53(0.37-0.76) | <0.001 |                           |                                 |
| No                              | Ref | 0.93(0.74-1.18)                       | 1.09(0.82-1.46) | 0.80(0.54-1.20) | 0.666  |                           |                                 |
| <b>BMI</b>                      |     |                                       |                 |                 |        |                           | 0.287                           |
| <30 kg/m <sup>2</sup>           | Ref | 0.95(0.79-1.15)                       | 0.76(0.61-0.96) | 0.64(0.47-0.85) | 0.001  |                           |                                 |
| ≥30 kg/m <sup>2</sup>           | Ref | 0.80(0.62-1.02)                       | 0.77(0.57-1.03) | 0.46(0.28-0.75) | 0.001  |                           |                                 |
| <b>Cancer Mortality</b>         |     |                                       |                 |                 |        |                           |                                 |
| <b>Age</b>                      |     |                                       |                 |                 |        |                           | 0.649                           |
| <65y                            | Ref | 0.99(0.81-1.20)                       | 0.85(0.67-1.09) | 0.84(0.61-1.15) | 0.151  |                           |                                 |
| ≥65y                            | Ref | 0.98(0.78-1.24)                       | 0.90(0.70-1.16) | 0.87(0.65-1.17) | 0.281  |                           |                                 |
| <b>Current smoker</b>           |     |                                       |                 |                 |        |                           | 0.391                           |
| Yes                             | Ref | 1.11(0.90-1.37)                       | 0.98(0.76-1.26) | 1.07(0.79-1.45) | 0.842  |                           |                                 |
| No                              | Ref | 0.92(0.75-1.13)                       | 0.80(0.63-1.02) | 0.65(0.47-0.88) | 0.003  |                           |                                 |
| <b>Current drinker</b>          |     |                                       |                 |                 |        |                           | 0.355                           |
| Yes                             | Ref | 1.00(0.84-1.20)                       | 0.82(0.66-1.02) | 0.82(0.62-1.08) | 0.050  |                           |                                 |
| No                              | Ref | 0.90(0.68-1.18)                       | 1.05(0.78-1.42) | 0.98(0.67-1.44) | 0.887  |                           |                                 |
| <b>BMI</b>                      |     |                                       |                 |                 |        |                           | 0.961                           |
| <30 kg/m <sup>2</sup>           | Ref | 1.01(0.83-1.21)                       | 0.94(0.75-1.16) | 0.97(0.74-1.26) | 0.638  |                           |                                 |
| ≥30 kg/m <sup>2</sup>           | Ref | 1.05(0.83-1.34)                       | 0.89(0.67-1.18) | 0.78(0.53-1.13) | 0.166  |                           |                                 |

Adjusted for age, race/ethnicity, BMI, family income-poverty ratio, smoking status (not for smoke stratified analysis), drinking (not for drinking stratified analysis), leisure-time physical activity, total energy intake, diabetes, hypertension, and cardiovascular disease.

**Table S6. Stratified analyses of the associations between dietary vitamin B12 intake with all-cause and cause-specific mortality in women**

|                                 |     | Quartile of dietary vitamin B12 intake |                 |                 |       | <i>P</i> <sub>trend</sub> | <i>P</i> <sub>interaction</sub> |
|---------------------------------|-----|----------------------------------------|-----------------|-----------------|-------|---------------------------|---------------------------------|
|                                 |     | Q1                                     | Q2              | Q3              | Q4    |                           |                                 |
| <b>All-cause Mortality</b>      |     |                                        |                 |                 |       |                           |                                 |
| <b>Age</b>                      |     |                                        |                 |                 |       |                           | 0.776                           |
| <65y                            | Ref | 1.04(0.93-1.17)                        | 1.09(0.95-1.25) | 1.01(0.85-1.2)  | 0.541 |                           |                                 |
| ≥65y                            | Ref | 1.07(0.98-1.17)                        | 1.01(0.91-1.12) | 1.06(0.94-1.2)  | 0.551 |                           |                                 |
| <b>Current smoker</b>           |     |                                        |                 |                 |       |                           | 0.485                           |
| Yes                             | Ref | 1.04(0.95-1.14)                        | 0.99(0.89-1.10) | 1.14(1.00-1.30) | 0.198 |                           |                                 |
| No                              | Ref | 1.04(0.93-1.15)                        | 1.08(0.95-1.22) | 0.98(0.84-1.14) | 0.813 |                           |                                 |
| <b>Current drinker</b>          |     |                                        |                 |                 |       |                           | 0.101                           |
| Yes                             | Ref | 1.05(0.96-1.15)                        | 1.07(0.96-1.19) | 1.06(0.92-1.21) | 0.259 |                           |                                 |
| No                              | Ref | 1.04(0.93-1.16)                        | 0.96(0.85-1.09) | 1.05(0.91-1.22) | 0.871 |                           |                                 |
| <b>BMI</b>                      |     |                                        |                 |                 |       |                           | 0.054                           |
| <30 kg/m <sup>2</sup>           | Ref | 1.05(0.97-1.15)                        | 1.07(0.96-1.18) | 1.08(0.95-1.22) | 0.171 |                           |                                 |
| ≥30 kg/m <sup>2</sup>           | Ref | 1.02(0.90-1.15)                        | 0.93(0.81-1.07) | 1.02(0.85-1.21) | 0.727 |                           |                                 |
| <b>Cardiovascular Mortality</b> |     |                                        |                 |                 |       |                           |                                 |
| <b>Age</b>                      |     |                                        |                 |                 |       |                           | 0.867                           |
| <65y                            | Ref | 0.99(0.73-1.35)                        | 0.97(0.67-1.42) | 0.67(0.39-1.15) | 0.276 |                           |                                 |
| ≥65y                            | Ref | 1.23(1.03-1.48)                        | 1.02(0.82-1.27) | 1.19(0.90-1.55) | 0.392 |                           |                                 |
| <b>Current smoker</b>           |     |                                        |                 |                 |       |                           | 0.399                           |
| Yes                             | Ref | 1.10(0.90-1.34)                        | 0.81(0.63-1.04) | 1.13(0.84-1.53) | 0.791 |                           |                                 |
| No                              | Ref | 1.13(0.87-1.46)                        | 1.31(0.98-1.77) | 1.03(0.70-1.52) | 0.344 |                           |                                 |
| <b>Current drinker</b>          |     |                                        |                 |                 |       |                           | 0.101                           |
| Yes                             | Ref | 1.02(0.82-1.26)                        | 1.07(0.83-1.37) | 0.84(0.58-1.2)  | 0.713 |                           |                                 |
| No                              | Ref | 1.26(1.00-1.59)                        | 0.92(0.69-1.22) | 1.24(0.89-1.72) | 0.577 |                           |                                 |
| <b>BMI</b>                      |     |                                        |                 |                 |       |                           | 0.008                           |
| <30 kg/m <sup>2</sup>           | Ref | 1.21(0.99-1.47)                        | 1.18(0.93-1.50) | 1.22(0.91-1.63) | 0.119 |                           |                                 |
| ≥30 kg/m <sup>2</sup>           | Ref | 0.95(0.73-1.24)                        | 0.64(0.46-0.90) | 0.85(0.56-1.29) | 0.065 |                           |                                 |
| <b>Cancer Mortality</b>         |     |                                        |                 |                 |       |                           |                                 |
| <b>Age</b>                      |     |                                        |                 |                 |       |                           | 0.547                           |
| <65y                            | Ref | 1.09(0.88-1.34)                        | 1.23(0.96-1.56) | 1.22(0.9-1.65)  | 0.099 |                           |                                 |
| ≥65y                            | Ref | 0.93(0.73-1.17)                        | 0.85(0.65-1.1)  | 0.75(0.54-1.03) | 0.066 |                           |                                 |
| <b>Current smoker</b>           |     |                                        |                 |                 |       |                           | 0.109                           |
| Yes                             | Ref | 1.29(1.02-1.62)                        | 1.32(1.02-1.71) | 1.32(0.96-1.81) | 0.045 |                           |                                 |
| No                              | Ref | 0.82(0.66-1.02)                        | 0.84(0.66-1.09) | 0.81(0.60-1.10) | 0.134 |                           |                                 |
| <b>Current drinker</b>          |     |                                        |                 |                 |       |                           | 0.560                           |
| Yes                             | Ref | 1.04(0.86-1.26)                        | 1.06(0.84-1.32) | 1.12(0.85-1.48) | 0.418 |                           |                                 |
| No                              | Ref | 0.90(0.68-1.18)                        | 0.89(0.66-1.21) | 0.84(0.58-1.21) | 0.326 |                           |                                 |
| <b>BMI</b>                      |     |                                        |                 |                 |       |                           | 0.189                           |
| <30 kg/m <sup>2</sup>           | Ref | 0.96(0.79-1.17)                        | 0.97(0.77-1.22) | 1.03(0.79-1.35) | 0.932 |                           |                                 |
| ≥30 kg/m <sup>2</sup>           | Ref | 1.09(0.84-1.41)                        | 1.14(0.85-1.53) | 0.95(0.64-1.40) | 0.853 |                           |                                 |

Adjusted for age, race/ethnicity, BMI, family income-poverty ratio, smoking status (not for smoke stratified analysis), drinking (not for drinking stratified analysis), leisure-time physical activity, total energy intake, diabetes, hypertension, and cardiovascular disease.

**Table S7 Hazard Ratio (HRs) and 95% CIs for all-cause and cause-specific mortality according to quartiles of dietary folate, vitamin B6, and B12 intake after excluding participants with cardiovascular disease at baseline**

|                          | Quartile of nutrient intake |                 |                 |                 | <i>P</i> <sub>trend</sub> |
|--------------------------|-----------------------------|-----------------|-----------------|-----------------|---------------------------|
|                          | Q1                          | Q2              | Q3              | Q4              |                           |
| Men                      |                             |                 |                 |                 |                           |
| Folate                   |                             |                 |                 |                 |                           |
| All-cause mortality      | Ref                         | 0.91(0.85-0.97) | 0.89(0.82-0.97) | 0.80(0.72-0.89) | <0.001                    |
| Cardiovascular mortality | Ref                         | 0.86(0.74-1.01) | 0.79(0.65-0.95) | 0.69(0.54-0.89) | 0.001                     |
| Cancer mortality         | Ref                         | 0.87(0.76-1.00) | 0.88(0.75-1.04) | 0.74(0.59-0.92) | 0.007                     |
| Vitamin B6               |                             |                 |                 |                 |                           |
| All-cause mortality      | Ref                         | 0.94(0.88-1.01) | 0.87(0.81-0.95) | 0.80(0.72-0.89) | <0.001                    |
| Cardiovascular mortality | Ref                         | 0.87(0.74-1.01) | 0.83(0.69-1.00) | 0.75(0.58-0.96) | 0.007                     |
| Cancer mortality         | Ref                         | 0.85(0.73-0.98) | 0.96(0.82-1.13) | 0.77(0.62-0.96) | 0.057                     |
| Vitamin B12              |                             |                 |                 |                 |                           |
| All-cause mortality      | Ref                         | 0.99(0.93-1.07) | 0.99(0.91-1.07) | 0.99(0.89-1.09) | 0.747                     |
| Cardiovascular mortality | Ref                         | 0.84(0.71-0.99) | 0.88(0.73-1.07) | 0.88(0.69-1.11) | 0.187                     |
| Cancer mortality         | Ref                         | 0.98(0.85-1.14) | 1.11(0.94-1.31) | 0.98(0.80-1.21) | 0.675                     |
| Women                    |                             |                 |                 |                 |                           |
| Folate                   |                             |                 |                 |                 |                           |
| All-cause mortality      | Ref                         | 0.90(0.83-0.96) | 0.87(0.80-0.95) | 0.84(0.75-0.93) | <0.001                    |
| Cardiovascular mortality | Ref                         | 0.78(0.66-0.92) | 0.71(0.57-0.87) | 0.49(0.36-0.66) | <0.001                    |
| Cancer mortality         | Ref                         | 0.93(0.80-1.09) | 1.04(0.86-1.24) | 0.82(0.65-1.04) | 0.305                     |
| Vitamin B6               |                             |                 |                 |                 |                           |
| All-cause mortality      | Ref                         | 0.94(0.88-1.01) | 0.90(0.82-0.97) | 0.85(0.77-0.95) | 0.001                     |
| Cardiovascular mortality | Ref                         | 0.88(0.75-1.04) | 0.76(0.62-0.93) | 0.53(0.39-0.71) | <0.001                    |
| Cancer mortality         | Ref                         | 1.02(0.88-1.19) | 0.89(0.74-1.07) | 0.92(0.73-1.15) | 0.230                     |
| Vitamin B12              |                             |                 |                 |                 |                           |
| All-cause mortality      | Ref                         | 1.03(0.96-1.11) | 1.02(0.94-1.12) | 1.05(0.95-1.17) | 0.376                     |
| Cardiovascular mortality | Ref                         | 1.07(0.90-1.28) | 1.02(0.82-1.26) | 1.01(0.77-1.32) | 0.903                     |
| Cancer mortality         | Ref                         | 1.06(0.90-1.25) | 1.03(0.85-1.25) | 1.08(0.86-1.36) | 0.543                     |

Adjusted for age, race/ethnicity, BMI, family income-poverty ratio, smoking status, drinking, leisure-time physical activity, total energy intake, diabetes, hypertension, and cardiovascular disease.

**Table S8 Hazard Ratio (HRs) and 95% CIs for all-cause and cause-specific mortality according to quartiles of dietary folate, vitamin B6, and B12 intake after excluding participants who died within two years of follow-up**

|                          | Quartile of nutrient intake |                 |                 |                 | <i>P</i> <sub>trend</sub> |
|--------------------------|-----------------------------|-----------------|-----------------|-----------------|---------------------------|
|                          | Q1                          | Q2              | Q3              | Q4              |                           |
| Men                      |                             |                 |                 |                 |                           |
| Folate                   |                             |                 |                 |                 |                           |
| All-cause mortality      | Ref                         | 0.94(0.88-1.00) | 0.91(0.84-0.98) | 0.85(0.77-0.94) | <0.001                    |
| Cardiovascular mortality | Ref                         | 0.85(0.74-0.98) | 0.83(0.70-0.98) | 0.67(0.54-0.84) | <0.001                    |
| Cancer mortality         | Ref                         | 0.85(0.74-0.98) | 0.84(0.71-0.99) | 0.66(0.53-0.83) | <0.001                    |
| Vitamin B6               |                             |                 |                 |                 |                           |
| All-cause mortality      | Ref                         | 0.96(0.89-1.02) | 0.90(0.84-0.97) | 0.87(0.79-0.97) | 0.001                     |
| Cardiovascular mortality | Ref                         | 0.93(0.80-1.06) | 0.85(0.72-1.00) | 0.86(0.69-1.06) | 0.039                     |
| Cancer mortality         | Ref                         | 0.81(0.70-0.93) | 0.93(0.79-1.09) | 0.80(0.64-0.99) | 0.045                     |
| Vitamin B12              |                             |                 |                 |                 |                           |
| All-cause mortality      | Ref                         | 1.01(0.94-1.08) | 1.02(0.94-1.11) | 1.03(0.93-1.14) | 0.508                     |
| Cardiovascular mortality | Ref                         | 0.92(0.80-1.07) | 0.91(0.76-1.08) | 0.92(0.74-1.14) | 0.311                     |
| Cancer mortality         | Ref                         | 0.97(0.84-1.13) | 1.08(0.91-1.28) | 0.99(0.80-1.22) | 0.730                     |
| Women                    |                             |                 |                 |                 |                           |
| Folate                   |                             |                 |                 |                 |                           |
| All-cause mortality      | Ref                         | 0.92(0.86-0.99) | 0.87(0.8-0.95)  | 0.86(0.78-0.96) | <0.001                    |
| Cardiovascular mortality | Ref                         | 0.84(0.71-0.98) | 0.70(0.57-0.85) | 0.56(0.43-0.74) | <0.001                    |
| Cancer mortality         | Ref                         | 0.93(0.79-1.09) | 1.03(0.86-1.23) | 0.84(0.66-1.06) | 0.357                     |
| Vitamin B6               |                             |                 |                 |                 |                           |
| All-cause mortality      | Ref                         | 0.96(0.89-1.02) | 0.92(0.85-1.00) | 0.87(0.79-0.97) | 0.004                     |
| Cardiovascular mortality | Ref                         | 0.92(0.79-1.08) | 0.78(0.64-0.94) | 0.53(0.40-0.70) | <0.001                    |
| Cancer mortality         | Ref                         | 1.02(0.87-1.19) | 0.97(0.81-1.16) | 0.87(0.69-1.09) | 0.297                     |
| Vitamin B12              |                             |                 |                 |                 |                           |
| All-cause mortality      | Ref                         | 1.04(0.97-1.12) | 1.04(0.96-1.13) | 1.04(0.93-1.15) | 0.383                     |
| Cardiovascular mortality | Ref                         | 1.13(0.96-1.33) | 0.99(0.81-1.21) | 1.03(0.80-1.33) | 0.951                     |
| Cancer mortality         | Ref                         | 1.05(0.89-1.23) | 1.10(0.92-1.33) | 1.03(0.81-1.30) | 0.559                     |

Adjusted for age, race/ethnicity, BMI, family income-poverty ratio, smoking status, drinking, leisure-time physical activity, total energy intake, diabetes, hypertension, and cardiovascular disease.



**Table S9 Hazard Ratio (HRs) and 95% CIs for all-cause and cause-specific mortality according to quartiles of dietary folate, vitamin B6, and B12 intake further adjusting folate supplement.**

|                          | Quartile of nutrient intake |                 |                  |                  | <i>P</i> <sub>trend</sub> |
|--------------------------|-----------------------------|-----------------|------------------|------------------|---------------------------|
|                          | Q1                          | Q2              | Q3               | Q4               |                           |
| Men                      |                             |                 |                  |                  |                           |
| Folate                   |                             |                 |                  |                  |                           |
| All-cause mortality      | Ref                         | 0.93(0.87-0.99) | 0.89(0.83-0.96)  | 0.81(0.74-0.90)  | <0.001                    |
| Cardiovascular mortality | Ref                         | 0.89(0.78-1.02) | 0.87(0.74-1.03)  | 0.76 (0.61-0.95) | 0.011                     |
| Cancer mortality         | Ref                         | 0.87(0.76-0.99) | 0.89(0.76-1.04)  | 0.68(0.55-0.83)  | 0.001                     |
| Vitamin B6               |                             |                 |                  |                  |                           |
| All-cause mortality      | Ref                         | 0.95(0.89-1.01) | 0.88(0.82-0.95)  | 0.82(0.74-0.91)  | <0.001                    |
| Cardiovascular mortality | Ref                         | 0.91(0.80-1.03) | 0.83(0.71-0.970) | 0.85(0.69-1.05)  | 0.021                     |
| Cancer mortality         | Ref                         | 0.85(0.74-0.97) | 0.96(0.83-1.11)  | 0.74(0.60-0.91)  | 0.023                     |
| Vitamin B12              |                             |                 |                  |                  |                           |
| All-cause mortality      | Ref                         | 1.00(0.94-1.07) | 1.02(0.94-1.10)  | 1.02(0.93-1.11)  | 0.633                     |
| Cardiovascular mortality | Ref                         | 0.91(0.79-1.04) | 0.94(0.80-1.10)  | 0.95(0.78-1.16)  | 0.500                     |
| Cancer mortality         | Ref                         | 0.97(0.84-1.11) | 1.09(0.93-1.27)  | 0.96(0.79-1.16)  | 0.867                     |
| Women                    |                             |                 |                  |                  |                           |
| Folate                   |                             |                 |                  |                  |                           |
| All-cause mortality      | Ref                         | 0.92(0.86-0.99) | 0.91(0.83-0.99)  | 0.89(0.80-0.99)  | 0.011                     |
| Cardiovascular mortality | Ref                         | 0.9(0.77-1.04)  | 0.87(0.72-1.06)  | 0.71(0.54-0.93)  | 0.014                     |
| Cancer mortality         | Ref                         | 0.94(0.81-1.1)  | 1.09(0.9-1.31)   | 0.86(0.67-1.09)  | 0.583                     |
| Vitamin B6               |                             |                 |                  |                  |                           |
| All-cause mortality      | Ref                         | 0.93(0.87-1)    | 0.91(0.84-0.99)  | 0.9(0.82-1)      | 0.012                     |
| Cardiovascular mortality | Ref                         | 0.93(0.8-1.08)  | 0.85(0.71-1.02)  | 0.69(0.53-0.9)   | 0.005                     |
| Cancer mortality         | Ref                         | 1.01(0.87-1.17) | 0.92(0.77-1.09)  | 0.91(0.72-1.13)  | 0.266                     |
| Vitamin B12              |                             |                 |                  |                  |                           |
| All-cause mortality      | Ref                         | 1.03(0.96-1.11) | 1.04(0.96-1.13)  | 1.07(0.97-1.19)  | 0.155                     |
| Cardiovascular mortality | Ref                         | 1.1(0.94-1.28)  | 1.04(0.86-1.26)  | 1.09(0.86-1.39)  | 0.486                     |
| Cancer mortality         | Ref                         | 1.03(0.88-1.2)  | 1.06(0.88-1.27)  | 1.05(0.84-1.31)  | 0.560                     |

Adjusted for age, race/ethnicity, BMI, family income-poverty ratio, smoking status, drinking, leisure-time physical activity, total energy intake, diabetes, hypertension, cardiovascular disease, and folate supplement.
